# Supplementary material for: Co3S4@polyaniline nanotubes as high-performance anode materials for sodium ion batteries
Source: Royal Society of Chemistry journal article supplement (doi:10.1039/c6ta01497f), 2016-01-01
Supplement: c6ta01497f1.pdf [file c6ta01497f1.pdf]

## Supporting Information

### **Co<sub>3</sub>S<sub>4</sub>@Polyaniline Nanotubes as High-Performance Anode Materials for Sodium Ion Batteries**

*Qian Zhou,<sup>a</sup> Li Liu,<sup>\*ab</sup> Zhifeng Huang,<sup>a</sup> Lingguang Yi,<sup>a</sup> Xianyou Wang,<sup>a</sup> Guozhong Cao<sup>\*b</sup>*

<sup>a</sup> *School of Chemistry, Xiangtan University, Hunan, Xiangtan 411105, China*

<sup>b</sup> *Department of Materials Science and Engineering, University of Washington, Seattle, WA 98195, USA*

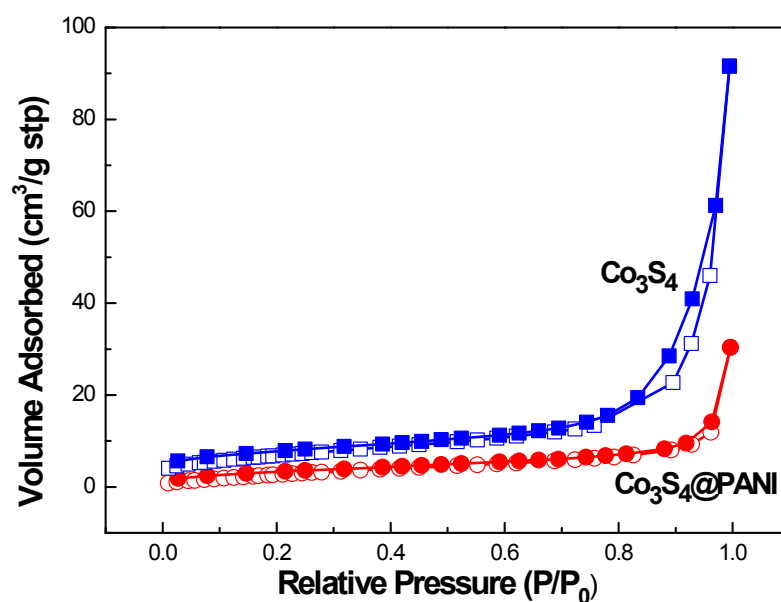

Figure S1 N<sub>2</sub> adsorption-desorption isotherm of Co<sub>3</sub>S<sub>4</sub>@PANI composite and bare Co<sub>3</sub>S<sub>4</sub>.

---

\*Corresponding author

E-mail addresses: [liulili1203@126.com](mailto:liulili1203@126.com) (L. Liu); [gzcao@u.washington.edu](mailto:gzcao@u.washington.edu) (G.Z. Cao)
